# Supplementary material
Source: Springer Nature journal article supplement (https://www.springermedizin.de/resource/supplementary/13054_2012_1039_MOESM2_ESM.pdf/9709826)

# Decision to Initiate Early Dialysis

Panel I – Dialysis decision.

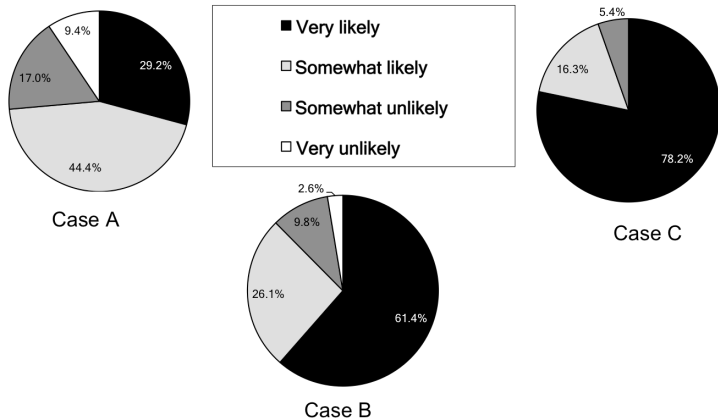

# BUN Level and Early Dialysis

Panel II – BUN level

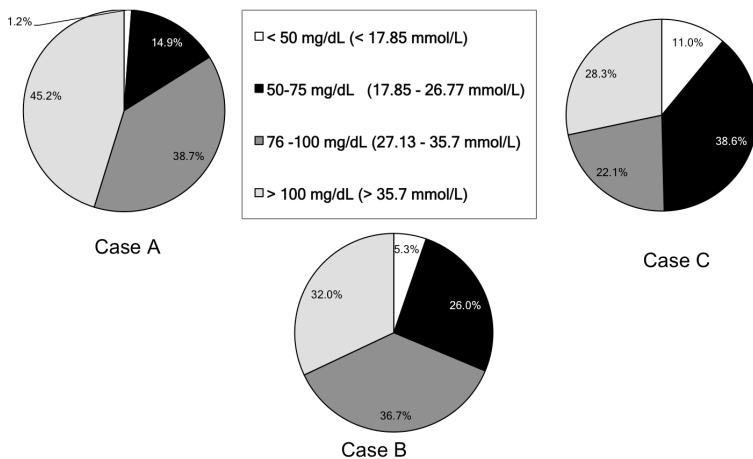

# Creatinine Elevation and Early Dialysis

Panel III. Creatinine elevation

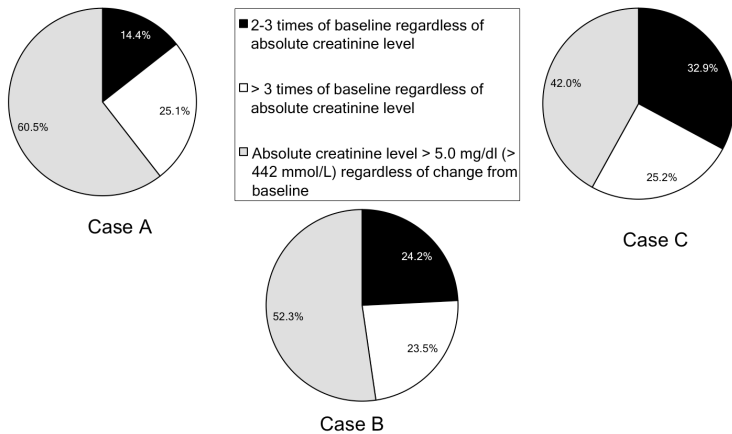

Supplement: MOESM2 [file 9709826]
